# Supplementary material for: Quality Formation Mechanism of Stiff Silkworm, Bombyx batryticatus Using UPLC-Q-TOF-MS-Based Metabolomics
Source: MDPI journal article supplement (doi:10.3390/molecules24203780), 2019-10-21
Supplement: s1 [file s1]

**Table S1** Differential metabolites identified based on VIP > 1, *p* < 0.05

| No.              | Metabolite identification                                         | Formula                                                       | Rt/min | m/z      | MS/MS fragment ion (m/z)                                                                    |
|------------------|-------------------------------------------------------------------|---------------------------------------------------------------|--------|----------|---------------------------------------------------------------------------------------------|
| 1 <sup>a</sup>   | L-Histidine                                                       | C <sub>6</sub> H <sub>9</sub> N <sub>3</sub> O <sub>2</sub>   | 0.58   | 156.0769 | 110.0689, 83.0588, 56.0488, 93.0431, 82.0511, 81.0437, 95.0585, 66.0330, 54.0328, 68.0485   |
| 2 <sup>a</sup>   | L-Asparagine                                                      | C <sub>4</sub> H <sub>8</sub> N <sub>2</sub> O <sub>3</sub>   | 0.62   | 133.0607 | 74.025, 43.0189, 44.0508, 70.0297, 46.0302, 31.9901, 87.0558                                |
| 3 <sup>a</sup>   | L-Carnitine                                                       | C <sub>7</sub> H <sub>15</sub> NO <sub>3</sub>                | 0.62   | 162.1124 | 60.0791, 85.0265, 43.0166, 102.0892, 103.0365, 162.1105, 57.0317, 58.0631, 59.0715          |
| 4 <sup>a</sup>   | L-Glutamine                                                       | C <sub>5</sub> H <sub>10</sub> N <sub>2</sub> O <sub>3</sub>  | 0.63   | 147.075  | 84.0434, 56.0489, 41.0382                                                                   |
| 5 <sup>a</sup>   | L-Leucine                                                         | C <sub>6</sub> H <sub>13</sub> NO <sub>2</sub>                | 1.21   | 132.102  | 44.0506, 43.0550, 41.0394, 86.0969, 30.0348, 39.0238, 69.0706                               |
| 6 <sup>a</sup>   | L-Isoleucine                                                      | C <sub>6</sub> H <sub>16</sub> NO <sub>2</sub>                | 1.57   | 132.1019 | 44.0503, 69.0704, 86.0971, 41.0395, 30.0346, 56.0504, 57.0581                               |
| 7 <sup>a</sup>   | L-Phenylalanine                                                   | C <sub>9</sub> H <sub>11</sub> NO <sub>2</sub>                | 1.82   | 166.0864 | 77.0381, 103.0534, 120.0798, 91.0534, 79.0536, 53.0388, 65.0384                             |
| 8 <sup>a</sup>   | L-Tryptophan                                                      | C <sub>11</sub> H <sub>12</sub> N <sub>2</sub> O <sub>2</sub> | 2.03   | 205.0977 | 118.0639, 115.0527, 91.0533, 143.0713, 146.0581, 117.0563, 132.0792, 130.0636, 77.0369      |
| 9 <sup>a</sup>   | L-Arginine                                                        | C <sub>6</sub> H <sub>14</sub> N <sub>4</sub> O <sub>2</sub>  | 0.59   | 175.12   | 70.0695, 60.0570, 43.0309, 71.0498, 68.0496, 72.0815, 130.0991, 116.0718                    |
| 10 <sup>a</sup>  | L-Valine                                                          | C <sub>5</sub> H <sub>11</sub> NO <sub>2</sub>                | 0.88   | 118.0863 | 58.0716, 42.0358, 59.0765, 43.0426, 118.0888, 56.0501, 30.0348                              |
| 11 <sup>a</sup>  | L-Proline                                                         | C <sub>5</sub> H <sub>9</sub> NO <sub>2</sub>                 | 0.67   | 116.0704 | 70.0627, 68.0470, 43.0520                                                                   |
| 12 <sup>a</sup>  | Quercetin                                                         | C <sub>15</sub> H <sub>10</sub> O <sub>7</sub>                | 2.7    | 303.0508 | 303.0519, 153.0188, 229.0509, 137.0238, 201.0554, 257.0456, 165.0189, 285.0412              |
| 13 <sup>a</sup>  | Kaempferol                                                        | C <sub>15</sub> H <sub>10</sub> O <sub>6</sub>                | 3.98   | 287.0559 | 287.0586, 153.0197, 121.0283, 165.0205                                                      |
| 14 <sup>bc</sup> | Rutin                                                             | C <sub>27</sub> H <sub>30</sub> O <sub>16</sub>               | 2.63   | 633.1436 | 633.1445, 331.1, 325.0312, 324.0251, 487.0834                                               |
| 15 <sup>bc</sup> | Kaempferol-7- <i>O</i> - $\beta$ -D-4- <i>O</i> -methyl glucoside | C <sub>22</sub> H <sub>22</sub> O <sub>11</sub>               | 3.04   | 463.1236 | 287.0585                                                                                    |
| 16 <sup>bc</sup> | Quercetin-7- <i>O</i> - $\beta$ -D-4- <i>O</i> -methyl glucoside  | C <sub>22</sub> H <sub>22</sub> O <sub>12</sub>               | 2.7    | 479.1183 |                                                                                             |
| 17 <sup>b</sup>  | Adenine                                                           | C <sub>5</sub> H <sub>5</sub> N <sub>5</sub>                  | 0.67   | 136.0621 | 119.0330, 136.0580, 92.0232, 65.0129, 67.0281, 94.0378, 55.0284, 40.0177                    |
| 18 <sup>b</sup>  | Xanthine                                                          | C <sub>5</sub> H <sub>4</sub> N <sub>4</sub> O <sub>2</sub>   | 0.75   | 153.0411 | 110.0344, 55.0286, 136.0137, 82.0394, 81.0075, 153.0401, 53.0131                            |
| 19 <sup>b</sup>  | Hypoxanthine                                                      | C <sub>5</sub> H <sub>4</sub> N <sub>4</sub> O                | 0.81   | 137.0463 | 55.0281, 137.0427, 119.0326, 110.0323, 82.0379, 94.0374, 65.0128, 67.0282, 92.0230, 40.0175 |
| 20 <sup>b</sup>  | Uracil                                                            | C <sub>4</sub> H <sub>4</sub> N <sub>2</sub> O <sub>2</sub>   | 0.7    | 113.0347 | 96.0083, 70.0294, 43.0175, 40.0188, 68.0129, 42.0341, 53.0033, 95.0243, 113.0349            |
| 21 <sup>b</sup>  | Beauverin                                                         | C <sub>45</sub> H <sub>57</sub> N <sub>3</sub> O <sub>9</sub> | 7.9    | 784.4217 | 244.1366, 262.1474, 784.4242, 134.0977, 523.2863, 623.3382, 541.2966, 234.1514, 362.2001    |
| 22 <sup>b</sup>  | Betaine                                                           | C <sub>5</sub> H <sub>11</sub> NO <sub>2</sub>                | 0.64   | 118.0861 | 58.0654, 59.0729, 43.0292, 118.0860, 55.0292, 72.0558, 30.0344                              |
| 23 <sup>a</sup>  | Choline                                                           | C <sub>5</sub> H <sub>14</sub> NO <sup>+</sup>                | 0.6    | 104.1063 | 58.0651, 60.0807, 44.0498, 45.0349, 42.034                                                  |
| 24 <sup>a</sup>  | Acetylcarnitine                                                   | C <sub>9</sub> H <sub>17</sub> NO <sub>4</sub>                | 0.67   | 204.1235 | 85.0297, 60.0821, 57.0348, 144.1027                                                         |
| 25 <sup>b</sup>  | Benzoic acid                                                      | C <sub>7</sub> H <sub>6</sub> O <sub>2</sub>                  | 1.17   | 123.0447 | 77.0392, 79.0545, 51.0231, 44.9973, 105.0335                                                |
| 26 <sup>b</sup>  | 2-Pyrrolidone-5-carboxylic acid                                   | C <sub>5</sub> H <sub>7</sub> NO <sub>3</sub>                 | 0.63   | 130.05   | 84.0453, 56.0500, 41.0392, 44.0138, 39.0240, 130.0674                                       |
| 27 <sup>b</sup>  | 2-Hydroxycinnamic acid                                            | C <sub>9</sub> H <sub>8</sub> O <sub>3</sub>                  | 1.17   | 165.0551 | 95.0491, 77.0381, 91.0537, 119.0479, 123.0431, 103.0521                                     |

|                 |                                                                                                       |                                                 |       |          |                                                                                    |
|-----------------|-------------------------------------------------------------------------------------------------------|-------------------------------------------------|-------|----------|------------------------------------------------------------------------------------|
| 28 <sup>b</sup> | 6-Hydroxynicotinic acid                                                                               | C <sub>6</sub> H <sub>5</sub> NO <sub>3</sub>   | 1.7   | 140.0343 | 122.0246, 78.0346, 94.0290, 51.0235, 66.0344, 140.0347, 39.0237                    |
| 29 <sup>b</sup> | Sphinganine                                                                                           | C <sub>18</sub> H <sub>39</sub> NO <sub>2</sub> | 6.58  | 302.3057 | 60.0441, 254.2837, 67.0540, 81.0690, 95.0847, 284.2929, 83.0830, 109.0996, 55.0549 |
| 30 <sup>c</sup> | Phytosphingosine                                                                                      | C <sub>18</sub> H <sub>39</sub> NO <sub>3</sub> | 7.11  | 318.3002 |                                                                                    |
| 31 <sup>c</sup> | (4 <i>E</i> ,2 <i>S</i> ,3 <i>R</i> )-2- <i>N</i> -octadecanoyl-4-tetradecasphingenine                | C <sub>32</sub> H <sub>63</sub> NO <sub>3</sub> | 10.43 | 532.4712 |                                                                                    |
| 32 <sup>c</sup> | (4 <i>E</i> ,6 <i>E</i> ,2 <i>S</i> ,3 <i>R</i> )-2- <i>N</i> -eicosanoyl-4,6-tetradecasphingadienine | C <sub>34</sub> H <sub>65</sub> NO <sub>3</sub> | 10.6  | 558.4859 |                                                                                    |

a. Reference standard; b. Blast in the database; c. Speculation based on literature.

**Table S2** Mass spectrometric data of lipids in *Bombyx Batryticatus*

| No. | Metabolite identification                      | Rt/min | m/z      |
|-----|------------------------------------------------|--------|----------|
| 1   | TG(54:8), Na <sup>+</sup>                      | 9.7    | 897.7006 |
| 2   | TG(52:6), Na <sup>+</sup>                      | 10.84  | 873.6991 |
| 3   | TG(52:4), Na <sup>+</sup>                      | 13.08  | 877.7303 |
| 4   | TG(56:7), Na <sup>+</sup>                      | 11.03  | 899.7158 |
| 5   | TG(52:5), Na <sup>+</sup>                      | 11.8   | 875.7148 |
| 6   | TG(54:6), Na <sup>+</sup>                      | 11.98  | 901.731  |
| 7   | TG(56:8), H <sup>+</sup>                       | 13.25  | 903.7476 |
| 8   | DG(35:5)                                       | 10.28  | 601.4807 |
| 9   | DG(35:6)                                       | 9.87   | 599.4655 |
| 10  | DG(33:4), Na <sup>+</sup>                      | 9.92   | 597.4493 |
| 11  | DG(36:6), Na <sup>+</sup>                      | 10.55  | 635.4641 |
| 12  | DG(36:2), Na <sup>+</sup>                      | 11.52  | 643.5269 |
| 13  | DG(34:1), Na <sup>+</sup>                      | 11.45  | 617.5121 |
| 14  | DG(34:3), Na <sup>+</sup>                      | 10.91  | 613.4806 |
| 15  | DG(36:4), Na <sup>+</sup>                      | 10.95  | 639.497  |
| 16  | DG(36:3), Na <sup>+</sup>                      | 11.2   | 641.512  |
| 17  | DG(36:5), Na <sup>+</sup>                      | 10.72  | 637.4784 |
| 18  | MG(22:6), H <sup>+</sup>                       | 8.8    | 403.282  |
| 19  | MG(18:1), Na <sup>+</sup>                      | 9.02   | 379.282  |
| 20  | MG(20:3)                                       | 9.45   | 381.2976 |
| 21  | MG(18:2), Na <sup>+</sup>                      | 8.68   | 377.2664 |
| 22  | Octadecadienoic acid (C18:2)                   | 8.03   | 281.2481 |
| 23  | Octadecatetraenoic acid (C18:4)                | 6.49   | 277.2167 |
| 24  | Eicosatetraenoic acid (C20:4), Na <sup>+</sup> | 9.36   | 327.2267 |
| 25  | Eicosatrienoic acid (C20:3), Na <sup>+</sup>   | 9.73   | 329.2434 |

|    |                                                 |       |          |
|----|-------------------------------------------------|-------|----------|
| 26 | Octadecapentaenoic acid (C18:5)                 | 7.1   | 275.2012 |
| 27 | Octadecatrienoic acid (C18:3) , Na <sup>+</sup> | 8.67  | 301.2131 |
| 28 | Octadecenoic acid (C18:1), Na <sup>+</sup>      | 9.36  | 305.2452 |
| 29 | Stearic acid                                    | 9.72  | 307.261  |
| 30 | LPC(14:1)                                       | 8.45  | 466.2932 |
| 31 | LPC(18:1), Na <sup>+</sup>                      | 8.66  | 544.3378 |
| 32 | LPC(18:2), H <sup>+</sup>                       | 8.11  | 520.34   |
| 33 | PC(36:2), Na <sup>+</sup>                       | 10.99 | 808.5836 |
| 34 | PC(36:5), Na <sup>+</sup>                       | 10.4  | 802.537  |
| 35 | PC(36:4), Na <sup>+</sup>                       | 10.56 | 804.554  |

---
